# Supplementary material for: In situ measurement of cesium-137 contamination in fruits from the northern Marshall Islands
Source: PubMed Central journal article supplement — Proc Natl Acad Sci U S A. 2019 Jul 15;116(31):15414–9. doi: 10.1073/pnas.1903481116 (PMC6681726; doi:10.1073/pnas.1903481116), 2019-07-15
Supplement: pnas.1903481116.sapp.pdf [file pnas.1903481116.sapp.pdf]

**Supporting Information**  
**Topping et al. *PNAS* (2019)**

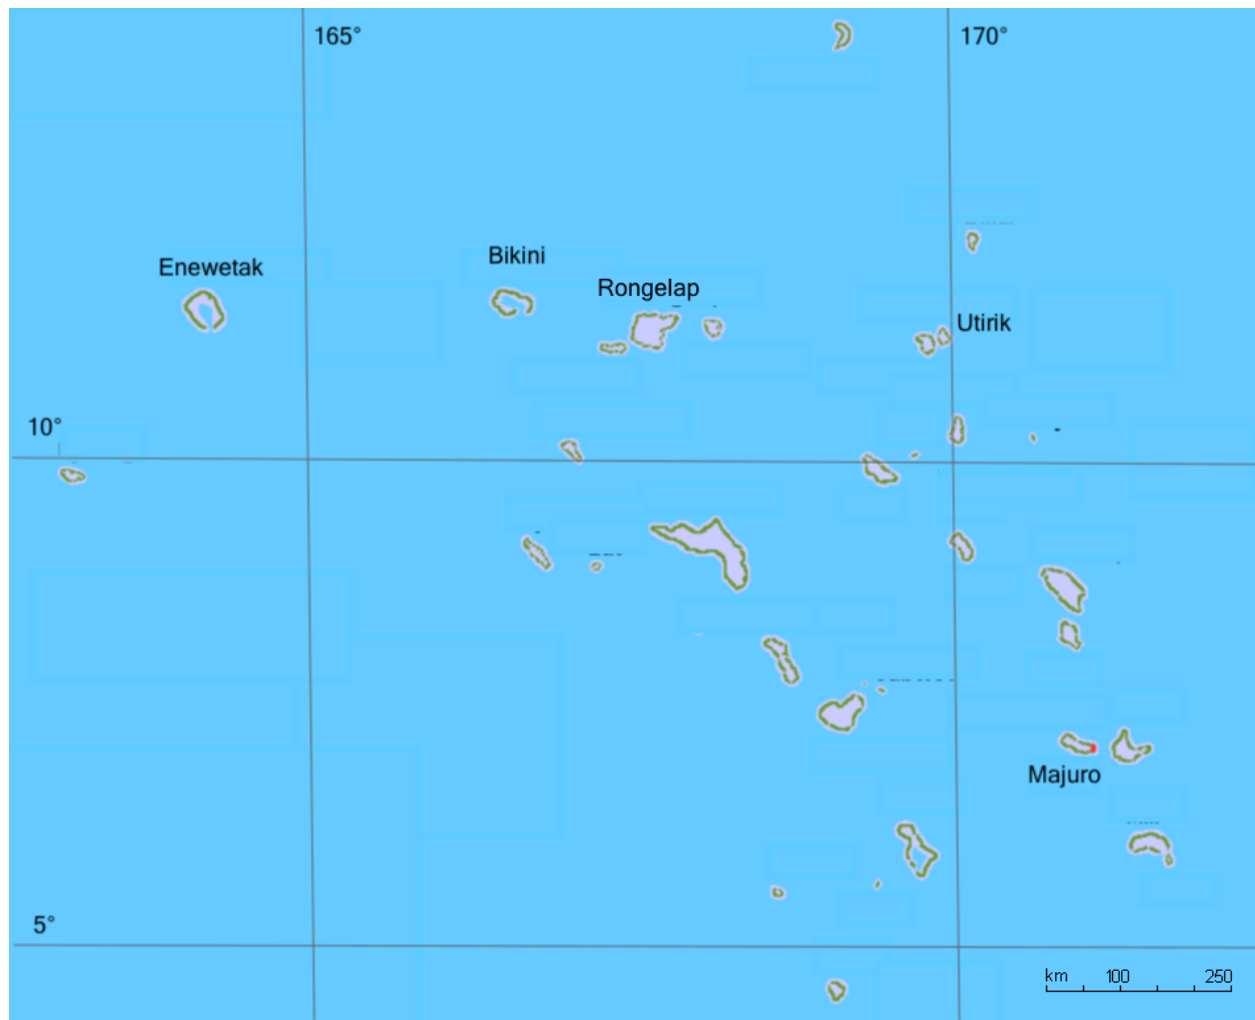

**Figure S1.** Map of the Marshall Islands. All 29 atolls are shown in the map, but only the four northern atolls studied herein (Enewetak, Bikini, Rongelap, and Utirik) are labeled, as well as Majuro, which is the country's capital located in the south. Vertical lines represent longitude and horizontal lines represent latitude.

**A**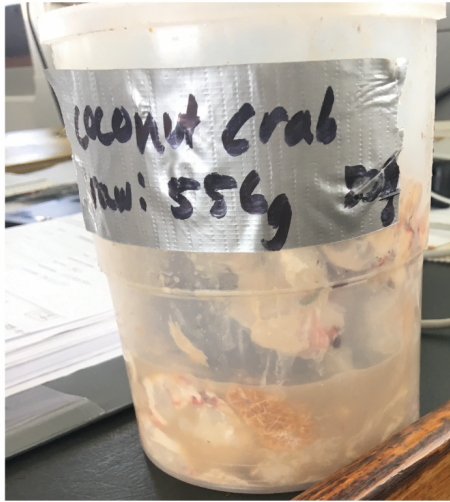**B**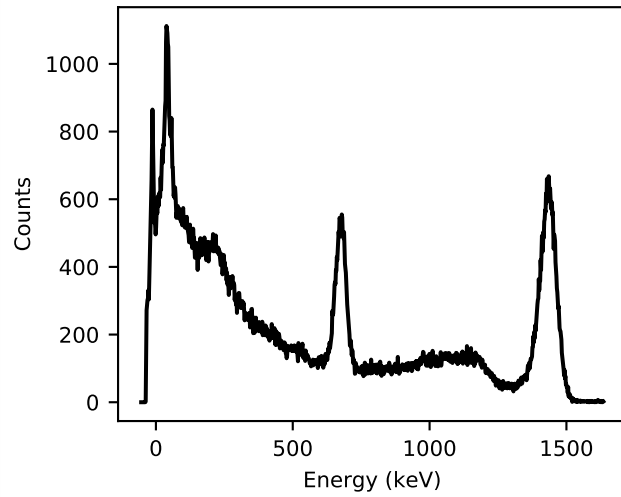

**Figure S2.** Coconut crab from Naen. **Panel 1:** Beaker with coconut crab meat; **Panel B:** Raw spectrum.

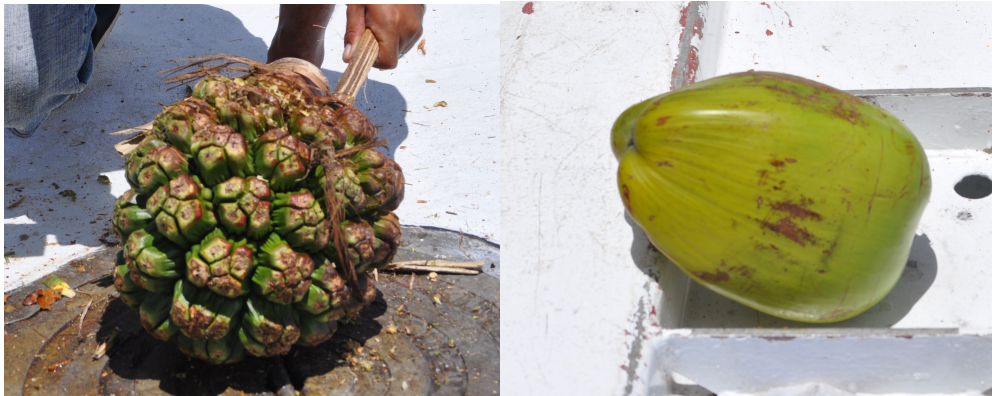

**Figure S3.** Pandanus fruit (left panel) and coconut fruit (right panel). Photographs taken aboard the Windward in August 2015. Both fruits grow on trees, although pandanus can grow in medium-sized bushes as well.

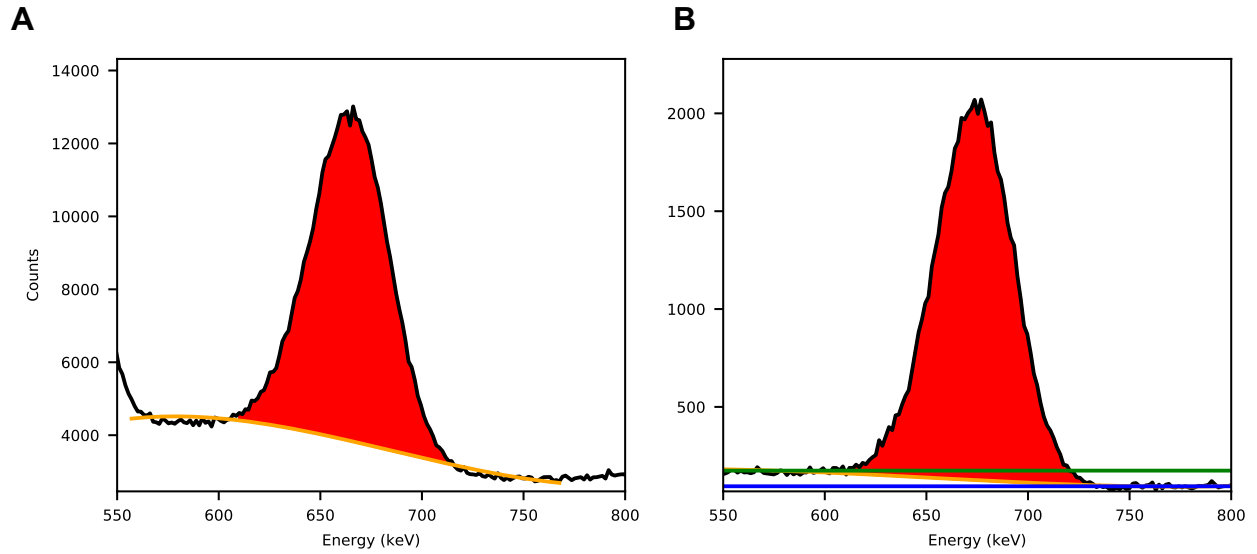

**Figure S4.** Background subtraction for sample fruit. **Panel A:** Raw data before subtraction. **Panel B:** Corrected spectrum after subtraction.

**Table S1.** Systematic uncertainties in the determination of the  $^{137}\text{Cs}$  content for a 100 Bq/kg result.

| Source                 | Uncertainty |
|------------------------|-------------|
| Background subtraction | 10%         |
| Filling factor         | 5%          |
| Weight measurement     | 15%         |
| Total                  | ~20%        |
